# Supplementary material for: Diversity and Variation of Epiphytic Diatoms on Ruppia maritima L., Related to Anthropogenic Impact in an Estuary in Southern Brazil
Source: MDPI journal article supplement (doi:10.3390/d14100787), 2022-09-22
Supplement: s1 [file s1]

**Table S1.** Complete list of epiphytic diatoms found on *Ruppia maritima* meadows of Patos Lagoon Estuary between November 2015 and February 2018, registered monthly in two studied sites: Saco da Quitéria (SQ) and Saco da Mangueira (SM). The relative abundance (%) of each taxa is indicated for each month. Abundant taxa (•).

| Taxa                                                                           | Year                                               |      |     |     |     |     |     |     |     |     |      |      |     |     |     |     |     |     |      |      |     |     |     |     |     |     |     |      |         |     |
|--------------------------------------------------------------------------------|----------------------------------------------------|------|-----|-----|-----|-----|-----|-----|-----|-----|------|------|-----|-----|-----|-----|-----|-----|------|------|-----|-----|-----|-----|-----|-----|-----|------|---------|-----|
|                                                                                | 2015                                               | 2016 |     |     |     |     |     |     |     |     |      |      |     |     |     |     |     |     |      | 2017 |     |     |     |     |     |     |     | 2018 |         |     |
|                                                                                | Sites: SQ= Saco da Quitéria, SM= Saco da Mangueira |      |     |     |     |     |     |     |     |     |      |      |     |     |     |     |     |     |      |      |     |     |     |     |     |     |     |      |         |     |
|                                                                                | SQ                                                 | SQ   | SQ  | SM  | SQ  | SM  | SQ  | SM  | SQ  | SM  | SQ   | SM   | SQ  | SM  | SQ  | SM  | SQ  | SM  | SQ   | SM   | SQ  | SM  | SQ  | SM  | SQ  | SM  | SQ  | SM   |         |     |
|                                                                                | Month                                              |      |     |     |     |     |     |     |     |     |      |      |     |     |     |     |     |     |      |      |     |     |     |     |     |     |     |      |         |     |
|                                                                                | N                                                  | M    | A   | A   | M   | M   | J   | J   | J   | J   | A    | A    | S   | S   | O   | O   | N   | N   | D    | D    | J   | J   | F   | F   | M   | M   | M   | A    | F       | F   |
|                                                                                | Abundance (%)                                      |      |     |     |     |     |     |     |     |     |      |      |     |     |     |     |     |     |      |      |     |     |     |     |     |     |     |      |         |     |
| <i>Achnanthes brevipes</i> C.Agardh                                            | 0.0                                                | 0.0  | 0.0 | 0.0 | 0.0 | 0.0 | 0.0 | 0.0 | 0.0 | 0.0 | 0.0  | 0.0  | 0.0 | 0.0 | 0.0 | 0.0 | 0.0 | 0.1 | 0.0  | 0.0  | 0.0 | 0.0 | 0.0 | 0.0 | 0.0 | 0.0 | 0.0 | 0.0  | 0.0     |     |
| <i>Achnanthes curvirostrum</i> J.Brun                                          | 0.0                                                | 0.0  | 0.0 | 0.0 | 0.0 | 0.0 | 0.0 | 0.0 | 0.1 | 0.0 | 0.1  | 0.0  | 0.2 | 0.0 | 0.0 | 0.0 | 0.0 | 0.0 | 0.0  | 0.0  | 0.0 | 0.0 | 0.1 | 0.2 | 0.0 | 0.0 | 0.0 | 0.0  | 0.0     |     |
| <i>Actinocyclus octonarius</i> Ehrenberg                                       | 0.0                                                | 0.0  | 0.0 | 0.0 | 0.0 | 0.0 | 0.0 | 0.0 | 0.0 | 0.1 | 0.0  | 0.0  | 0.2 | 0.0 | 0.0 | 0.0 | 0.0 | 0.0 | 0.1  | 0.0  | 0.0 | 0.0 | 0.0 | 0.0 | 0.0 | 0.0 | 0.0 | 0.0  | 0.0     |     |
| <i>Actinopthichus</i> sp.                                                      | 0.0                                                | 0.0  | 0.0 | 0.0 | 0.0 | 0.0 | 0.0 | 0.0 | 0.0 | 0.0 | 0.0  | 0.0  | 0.0 | 0.1 | 0.0 | 0.0 | 0.0 | 0.0 | 0.0  | 0.0  | 0.0 | 0.0 | 0.0 | 0.0 | 0.1 | 0.0 | 0.0 | 0.0  | 0.0     |     |
| <i>Actinoptychus</i> cf. <i>splendens</i> (Shad-bolt) Ralfs                    | 0.0                                                | 0.0  | 0.0 | 0.0 | 0.0 | 0.0 | 0.0 | 0.0 | 0.0 | 0.0 | 0.0  | 0.0  | 0.0 | 0.0 | 0.0 | 0.0 | 0.1 | 0.0 | 0.0  | 0.0  | 0.0 | 0.0 | 0.0 | 0.1 | 0.0 | 0.0 | 0.0 | 0.0  | 0.0     |     |
| <i>Actinoptychus</i> cf. <i>maculatus</i> A.W.F.Schmidt                        | 0.0                                                | 0.0  | 0.0 | 0.0 | 0.0 | 0.0 | 0.0 | 0.0 | 0.0 | 0.0 | 0.0  | 0.0  | 0.0 | 0.0 | 0.0 | 0.0 | 0.0 | 0.0 | 0.0  | 0.0  | 0.0 | 0.0 | 0.0 | 0.0 | 0.0 | 0.1 | 0.0 | 0.0  | 0.2     |     |
| • <i>Ambo tenuissimus</i> (Hustedt) A. Witkowski, Lange-Bertalot & M. Ashworth | 7.9                                                | 12.2 | 4.0 | 0.2 | 8.0 | 0.4 | 5.5 | 0.1 | 6.5 | 0.5 | 12.0 | 12.5 | 4.0 | 0.7 | 1.5 | 6.5 | 8.1 | 1.1 | 10.1 | 1.5  | 6.6 | 2.8 | 3.6 | 1.7 | 0.9 | 2.3 | 0.9 | 2.7  | ##<br># | 3.9 |
| <i>Amphicoconeis</i> cf. <i>disculoides</i> (Hustedt) Stefano & Marino         | 0.0                                                | 0.0  | 0.0 | 0.0 | 0.0 | 0.0 | 0.0 | 0.0 | 0.0 | 0.0 | 0.0  | 0.0  | 0.0 | 0.0 | 0.9 | 0.0 | 0.2 | 0.0 | 0.0  | 0.0  | 0.3 | 0.0 | 0.4 | 0.0 | 0.0 | 0.1 | 0.0 | 0.0  | 0.9     |     |
| <i>Amphora</i> sp.1                                                            | 0.0                                                | 0.0  | 0.0 | 0.0 | 0.0 | 0.0 | 0.0 | 0.0 | 0.0 | 0.0 | 0.1  | 0.0  | 0.0 | 0.0 | 0.0 | 0.0 | 0.0 | 0.0 | 0.0  | 0.0  | 0.0 | 0.0 | 0.0 | 0.0 | 0.0 | 0.0 | 0.0 | 0.0  | 0.0     |     |
| <i>Amphora</i> sp.2                                                            | 0.0                                                | 0.0  | 0.0 | 0.0 | 0.0 | 0.0 | 0.0 | 0.0 | 0.0 | 0.0 | 0.0  | 0.0  | 0.0 | 0.0 | 0.5 | 0.0 | 0.0 | 0.0 | 0.2  | 0.0  | 0.0 | 0.0 | 0.0 | 0.0 | 0.0 | 0.0 | 0.0 | 0.0  | 0.0     |     |
| <i>Amphora</i> sp.3                                                            | 0.0                                                | 0.0  | 0.2 | 0.0 | 0.0 | 0.0 | 0.0 | 0.0 | 0.0 | 0.0 | 0.0  | 0.0  | 0.0 | 0.0 | 0.0 | 0.2 | 0.0 | 0.0 | 0.0  | 0.0  | 0.0 | 0.2 | 0.0 | 0.0 | 0.0 | 0.0 | 0.0 | 0.0  | 0.0     |     |
| <i>Amphora</i> sp.4                                                            | 0.0                                                | 0.0  | 0.0 | 0.0 | 0.0 | 0.0 | 0.0 | 0.0 | 0.0 | 0.0 | 0.0  | 0.0  | 0.0 | 0.1 | 0.0 | 0.0 | 0.0 | 0.0 | 0.0  | 0.0  | 0.0 | 0.0 | 0.0 | 0.0 | 0.0 | 0.0 | 0.0 | 0.0  | 0.0     |     |
| <i>Amphora</i> sp.5                                                            | 0.0                                                | 0.1  | 0.0 | 0.0 | 0.0 | 0.0 | 0.0 | 0.0 | 0.0 | 0.0 | 0.0  | 0.0  | 0.0 | 0.0 | 0.0 | 0.0 | 0.0 | 0.0 | 0.0  | 0.0  | 0.0 | 0.0 | 0.0 | 0.0 | 0.0 | 0.0 | 0.0 | 0.0  | 0.0     |     |
| <i>Amphora charrua</i> Metzeltin, Lange-Bertalot & García-Rodríguez            | 0.0                                                | 0.2  | 0.3 | 0.0 | 0.0 | 0.0 | 0.0 | 0.0 | 0.1 | 0.0 | 0.0  | 0.0  | 0.0 | 0.0 | 0.0 | 0.1 | 0.0 | 0.0 | 0.0  | 0.0  | 0.0 | 0.0 | 0.0 | 0.0 | 0.5 | 0.0 | 0.0 | 0.0  | 0.0     |     |
| <i>Amphora crucifera</i> Cleve-Euler                                           | 1.5                                                | 0.2  | 0.1 | 0.0 | 0.1 | 0.0 | 0.0 | 0.0 | 0.0 | 0.2 | 0.0  | 0.1  | 0.3 | 0.1 | 0.3 | 0.5 | 0.0 | 0.1 | 0.0  | 0.0  | 0.2 | 0.0 | 0.2 | 0.0 | 0.1 | 0.1 | 0.6 | 0.0  | 0.0     |     |
| <i>Amphora pseudoholsatica</i> T.Nagumo & H.Kobayasi                           | 0.1                                                | 0.5  | 0.4 | 0.0 | 0.7 | 0.0 | 0.3 | 0.0 | 0.5 | 0.0 | 1.3  | 0.1  | 0.5 | 0.1 | 0.1 | 0.0 | 0.2 | 0.0 | 0.8  | 0.0  | 0.1 | 0.0 | 0.0 | 0.0 | 0.0 | 0.0 | 0.0 | 0.1  | 0.1     |     |
| <i>Aulacoseira</i> sp.1                                                        | 0.0                                                | 0.0  | 0.0 | 0.0 | 0.0 | 0.0 | 0.0 | 0.0 | 0.0 | 0.0 | 0.0  | 0.0  | 0.0 | 0.0 | 0.0 | 0.0 | 0.0 | 0.0 | 0.0  | 0.0  | 0.0 | 0.0 | 0.0 | 0.0 | 0.0 | 0.0 | 0.0 | 0.0  | 0.2     |     |
| <i>Aulacoseira</i> sp.2                                                        | 0.0                                                | 0.0  | 0.0 | 0.0 | 0.0 | 0.0 | 0.0 | 0.0 | 0.0 | 0.0 | 0.0  | 0.2  | 0.0 | 0.0 | 0.0 | 0.0 | 0.0 | 0.0 | 0.0  | 0.0  | 0.0 | 0.0 | 0.0 | 1.5 | 0.0 | 0.0 | 0.0 | 0.0  | 0.0     |     |
| • <i>Aulacoseira granulata</i> (Ehrenberg) Simonsen                            | 2.0                                                | 0.6  | 0.0 | 0.0 | 0.0 | 0.0 | 0.0 | 0.0 | 0.2 | 0.1 | 0.0  | 0.0  | 0.3 | 0.0 | 0.1 | 1.5 | 0.2 | 0.2 | 0.5  | 0.0  | 0.3 | 0.1 | 0.1 | 0.2 | 0.2 | 0.0 | 1.9 | 0.1  | 0.0     | 0.5 |

|                                                                 |     |     |     |     |     |     |     |     |     |          |     |          |     |          |     |          |     |          |          |          |          |          |     |          |          |     |          |     |     |          |     |
|-----------------------------------------------------------------|-----|-----|-----|-----|-----|-----|-----|-----|-----|----------|-----|----------|-----|----------|-----|----------|-----|----------|----------|----------|----------|----------|-----|----------|----------|-----|----------|-----|-----|----------|-----|
| Bacillaria cf. socialis (W.Gregory) Ralfs                       | 0.0 | 0.0 | 0.0 | 0.0 | 0.0 | 0.0 | 0.0 | 0.0 | 0.0 | 0.0      | 0.0 | 0.0      | 0.0 | 0.0      | 0.0 | 0.0      | 0.0 | 0.0      | 0.1      | 0.0      | 0.0      | 0.0      | 0.0 | 0.0      | 0.0      | 0.0 | 0.0      | 0.0 | 0.0 | 0.0      | 0.0 |
| •Bacillaria paxillifera (O.F.Müller)<br>T.Marsson               | 5.9 | 0.5 | ##  | 0.4 | ##  | 1.8 | #   | 9.9 | #   | 0.0      | 2.8 | 2.1      | 0.8 | 0.0      | 0.3 | 0.0      | 0.2 | 0.0      | 0.0      | 0.0      | 0.0      | 0.0      | 0.0 | 0.4      | 0.2      | 0.0 | 0.5      | 0.0 | 8.5 | 0.0      | 0.0 |
| Caloneis permagna (Bailey) Cleve                                | 0.0 | 0.0 | 0.0 | 0.0 | 0.0 | 0.0 | 0.0 | 0.0 | 0.0 | 0.0      | 0.0 | 0.0      | 0.0 | 0.0      | 0.0 | 0.0      | 0.0 | 0.0      | 0.0      | 0.0      | 0.0      | 0.0      | 0.0 | 0.0      | 0.0      | 0.0 | 0.0      | 0.0 | 0.0 | 0.0      | 0.1 |
| Caloneis westii (W.Smith) Hendey                                | 0.0 | 0.1 | 0.1 | 0.0 | 0.0 | 0.0 | 0.0 | 0.0 | 0.1 | 0.0      | 0.0 | 0.0      | 0.2 | 0.0      | 0.0 | 0.0      | 0.0 | 0.0      | 0.0      | 0.0      | 0.0      | 0.0      | 0.0 | 0.0      | 0.0      | 0.0 | 0.0      | 0.0 | 0.0 | 0.0      | 0.0 |
| Campylodiscus clypeus (Ehrenberg) Eh-<br>renberg ex Kützing     | 0.0 | 0.0 | 0.0 | 0.0 | 0.0 | 0.0 | 0.0 | 0.0 | 0.0 | 0.0      | 0.0 | 0.0      | 0.0 | 0.0      | 0.0 | 0.0      | 0.0 | 0.0      | 0.0      | 0.0      | 0.0      | 0.0      | 0.0 | 0.0      | 0.0      | 0.0 | 0.0      | 0.0 | 0.0 | 0.0      | 0.2 |
| Capartogramma crucicula (Grunow)<br>R.Ross                      | 0.1 | 0.0 | 0.0 | 0.0 | 0.0 | 0.0 | 0.0 | 0.0 | 0.0 | 0.0      | 0.0 | 0.0      | 0.0 | 0.0      | 0.0 | 0.0      | 0.0 | 0.0      | 0.0      | 0.0      | 0.0      | 0.0      | 0.0 | 0.0      | 0.0      | 0.0 | 0.0      | 0.0 | 0.0 | 0.0      | 0.0 |
| •Catenula adhaerens (Mereschkowsky)<br>Mereschkowsky            | 2.7 | 5.4 | 0.9 | 0.2 | 1.2 | 1.3 | 2.1 | 0.1 | 1.7 | 3.9      | 4.6 | 15.<br>9 | 1.1 | 7.7      | 0.4 | 22.<br>9 | 3.7 | 3.1      | 6.8      | 8.2      | 5.1      | 5.5      | 0.7 | 2.5      | 0.5      | 0.9 | 2.7      | 0.2 | 1.8 | 10.<br>4 |     |
| Cerataulina sp.                                                 | 0.0 | 0.0 | 0.0 | 0.0 | 0.0 | 0.0 | 0.0 | 0.0 | 0.0 | 0.0      | 0.0 | 0.0      | 0.0 | 0.0      | 0.0 | 0.0      | 0.0 | 0.0      | 0.0      | 0.0      | 0.0      | 0.8      | 0.0 | 0.0      | 0.0      | 0.0 | 0.0      | 0.0 | 0.0 | 0.0      | 0.0 |
| •Chaetoceros sp.                                                | 0.0 | 0.0 | 0.0 | 0.0 | 0.0 | 0.0 | 0.0 | 0.0 | 0.0 | 0.0      | 0.0 | 0.0      | 0.0 | 0.0      | 0.0 | 0.0      | 0.0 | 0.0      | 0.0      | 0.0      | 3.8      | 0.0      | 0.0 | 0.0      | 0.0      | 0.0 | 0.0      | 0.0 | 0.0 | 0.0      | 0.0 |
| Chamaepinnularia sp.                                            | 0.0 | 0.0 | 0.0 | 0.0 | 0.0 | 0.0 | 0.0 | 0.0 | 0.0 | 0.0      | 0.0 | 0.0      | 0.0 | 0.1      | 0.0 | 0.0      | 0.0 | 0.0      | 0.0      | 0.0      | 0.0      | 0.0      | 0.0 | 0.0      | 0.0      | 0.0 | 0.0      | 0.0 | 0.0 | 0.0      | 0.0 |
| Cocconeis sp.                                                   | 0.0 | 0.0 | 0.0 | 0.0 | 0.0 | 0.0 | 0.0 | 0.0 | 0.1 | 0.0      | 0.0 | 0.1      | 0.0 | 0.0      | 0.0 | 0.0      | 0.0 | 0.0      | 0.0      | 0.0      | 0.0      | 0.1      | 0.0 | 0.0      | 0.0      | 0.0 | 0.0      | 0.0 | 0.0 | 0.0      | 0.0 |
| Cocconeis fluviatilis J.H.Wallace                               | 0.0 | 0.7 | 0.0 | 0.0 | 0.1 | 0.2 | 0.2 | 0.0 | 0.3 | 0.4      | 0.3 | 0.9      | 0.5 | 0.1      | 0.0 | 0.2      | 0.2 | 0.0      | 0.3      | 0.4      | 0.7      | 0.1      | 0.1 | 0.0      | 0.0      | 0.0 | 0.0      | 0.1 | 0.2 | 0.0      | 0.0 |
| Cocconeis peltoides Hustedt                                     | 0.1 | 0.4 | 0.2 | 0.0 | 0.0 | 0.0 | 0.2 | 0.0 | 0.2 | 0.1      | 0.0 | 1.1      | 0.0 | 0.4      | 0.1 | 1.6      | 0.0 | 0.7      | 0.6      | 1.0      | 0.4      | 0.8      | 0.0 | 0.7      | 0.0      | 0.0 | 0.1      | 0.4 | 0.4 | 0.5      | 0.0 |
| •Cocconeis placentula Ehrenberg                                 | 7.2 | 4.6 | 4.5 | 8.8 | 2.5 | 6.0 | 1.8 | 6.4 | 2.2 | 14.<br>3 | 6.0 | 21.<br>1 | 8.5 | 14.<br>2 | 7.2 | 17.<br>8 | 9.5 | 33.<br>9 | 18.<br>5 | 31.<br>4 | 11.<br>4 | 71.<br>2 | 0.3 | 64.<br>4 | 23.<br>2 | 1.1 | 75.<br>1 | 5.9 | 0.0 | 2.3      | 0.0 |
| Coscinodiscopsis jonesiana (Greville)<br>E.A.Sar & I.Sunesen    | 0.0 | 0.0 | 0.0 | 0.0 | 0.0 | 0.0 | 0.0 | 0.0 | 0.0 | 0.3      | 0.0 | 0.0      | 0.0 | 0.0      | 0.0 | 0.0      | 0.0 | 0.6      | 0.0      | 0.0      | 0.0      | 0.0      | 0.0 | 1.0      | 0.1      | 0.0 | 1.0      | 0.0 | 0.0 | 0.4      | 0.0 |
| Coscinodiscus radiatus Ehrenberg                                | 0.0 | 0.0 | 0.0 | 0.0 | 0.0 | 0.0 | 0.0 | 0.0 | 0.0 | 0.0      | 0.0 | 0.0      | 0.0 | 0.3      | 0.0 | 0.2      | 0.0 | 0.0      | 0.0      | 0.1      | 0.2      | 0.0      | 0.1 | 0.0      | 0.0      | 0.0 | 0.1      | 0.0 | 0.0 | 0.1      | 0.0 |
| Craspedodiscus sp.                                              | 0.0 | 0.0 | 0.0 | 0.0 | 0.0 | 0.0 | 0.0 | 0.0 | 0.0 | 0.0      | 0.0 | 0.0      | 0.0 | 0.0      | 0.0 | 0.0      | 0.0 | 0.0      | 0.0      | 0.0      | 0.0      | 0.0      | 0.0 | 0.0      | 0.0      | 0.0 | 0.0      | 0.0 | 0.0 | 0.0      | 0.2 |
| Ctenophora pulchella (Ralfs ex Kützing)<br>D.M.Williams & Round | 0.3 | 0.0 | 0.1 | 0.0 | 0.3 | 0.0 | 0.0 | 0.0 | 0.2 | 0.0      | 0.0 | 0.0      | 0.0 | 0.0      | 0.0 | 0.0      | 0.0 | 0.0      | 0.0      | 0.0      | 0.0      | 0.0      | 0.0 | 0.0      | 0.0      | 0.0 | 0.3      | 0.0 | 0.3 | 0.0      | 0.0 |
| •Cyclotella meneghiniana Kützing                                | 0.0 | 0.0 | 0.0 | 0.0 | 0.0 | 0.0 | 0.5 | 0.0 | 0.0 | 0.0      | 0.1 | 0.0      | 0.7 | 0.0      | 0.0 | 0.0      | 1.9 | 0.0      | 1.0      | 0.0      | 2.6      | 0.0      | 0.0 | 0.0      | 0.0      | 0.0 | 0.0      | 0.0 | 0.0 | 0.3      | 0.0 |
| •Cyclotella sp.1                                                | 0.8 | 0.0 | 0.0 | 0.0 | 0.0 | 0.0 | 0.0 | 0.0 | 0.1 | 0.0      | 0.0 | 0.2      | 0.0 | 0.1      | 0.0 | 0.1      | 0.5 | 0.8      | 6.0      | 0.0      | 0.3      | 0.0      | 0.1 | 0.0      | 0.0      | 0.0 | 0.0      | 0.0 | 0.0 | 0.0      | 0.1 |
| Cyclotella striata (Kützing) Grunow                             | 0.0 | 0.0 | 0.0 | 0.0 | 0.0 | 0.0 | 0.0 | 0.0 | 0.0 | 0.0      | 0.0 | 0.0      | 0.1 | 0.0      | 0.0 | 0.0      | 0.0 | 0.0      | 0.1      | 0.0      | 0.0      | 0.0      | 0.0 | 0.0      | 0.0      | 0.0 | 0.0      | 0.0 | 0.0 | 0.0      | 0.0 |
| Desikaneis sp.                                                  | 0.0 | 0.0 | 0.0 | 0.0 | 0.0 | 0.0 | 0.0 | 0.0 | 0.1 | 0.0      | 0.0 | 0.0      | 0.0 | 0.0      | 0.0 | 0.0      | 0.0 | 0.0      | 0.0      | 0.0      | 0.0      | 0.0      | 0.0 | 0.0      | 0.0      | 0.0 | 0.0      | 0.0 | 0.0 | 0.0      | 0.0 |
| Desikaneis simplex (Frenguelli) Tremarin,<br>Procopiak & Ludwig | 0.1 | 0.1 | 0.0 | 0.0 | 0.0 | 0.0 | 0.0 | 0.0 | 0.0 | 0.0      | 0.3 | 0.0      | 0.0 | 0.0      | 0.0 | 0.1      | 0.0 | 0.0      | 0.2      | 0.0      | 0.1      | 0.0      | 0.0 | 0.0      | 0.0      | 0.1 | 0.0      | 0.0 | 0.2 | 0.0      | 0.0 |
| Diploneis aestuari Hustedt                                      | 0.0 | 0.0 | 0.0 | 0.0 | 0.0 | 0.0 | 0.0 | 0.0 | 0.0 | 0.0      | 0.0 | 0.0      | 0.0 | 0.0      | 0.0 | 0.0      | 0.0 | 0.0      | 0.1      | 0.0      | 0.0      | 0.1      | 0.0 | 0.0      | 0.0      | 0.1 | 0.0      | 0.0 | 0.1 | 0.2      | 0.0 |
| Diploneis aff. elliptica (Kützing) Cleve                        | 0.0 | 0.1 | 0.1 | 0.0 | 0.1 | 0.0 | 0.0 | 0.0 | 0.0 | 0.0      | 0.2 | 0.0      | 0.1 | 0.0      | 0.1 | 0.0      | 0.1 | 0.0      | 0.0      | 0.0      | 0.0      | 0.0      | 0.0 | 0.0      | 0.0      | 0.0 | 0.0      | 0.0 | 0.1 | 0.0      | 0.0 |
| Diploneis didyma (Ehrenberg) Ehrenberg                          | 0.0 | 0.0 | 0.0 | 0.0 | 0.0 | 0.2 | 0.0 | 0.0 | 0.0 | 0.1      | 0.0 | 0.2      | 0.1 | 0.0      | 0.0 | 0.4      | 0.0 | 0.0      | 0.0      | 0.0      | 0.0      | 0.1      | 0.0 | 0.0      | 0.2      | 0.0 | 0.0      | 0.0 | 0.0 | 0.2      | 0.0 |
| Diploneis puella (Schumann) Cleve                               | 0.0 | 0.0 | 0.0 | 0.0 | 0.0 | 0.0 | 0.0 | 0.0 | 0.0 | 0.0      | 0.0 | 0.0      | 0.0 | 0.0      | 0.0 | 0.0      | 0.0 | 0.1      | 0.0      | 0.0      | 0.0      | 0.0      | 0.0 | 0.0      | 0.0      | 0.0 | 0.0      | 0.0 | 0.0 | 0.0      | 0.0 |
| Diploneis smithii (Brébisson) Cleve                             | 0.0 | 0.0 | 0.0 | 0.0 | 0.0 | 0.0 | 0.0 | 0.0 | 0.0 | 0.0      | 0.0 | 0.0      | 0.1 | 0.0      | 0.0 | 0.0      | 0.0 | 0.0      | 0.0      | 0.0      | 0.1      | 0.0      | 0.0 | 0.0      | 0.0      | 0.1 | 0.0      | 0.0 | 0.0 | 0.0      | 0.0 |
| Encyonema silesiacum (Bleisch) D.G.Mann                         | 0.0 | 0.0 | 0.0 | 0.0 | 0.0 | 0.0 | 0.0 | 0.0 | 0.2 | 0.0      | 0.0 | 0.0      | 0.0 | 0.0      | 0.0 | 0.0      | 0.0 | 0.0      | 0.0      | 0.0      | 0.0      | 0.0      | 0.0 | 0.0      | 0.0      | 0.0 | 0.0      | 0.0 | 0.0 | 0.0      | 0.0 |

|                                                                            |     |      |     |     |     |     |     |     |     |     |      |     |     |      |      |     |     |      |     |      |     |     |      |     |     |      |     |     |     |      |
|----------------------------------------------------------------------------|-----|------|-----|-----|-----|-----|-----|-----|-----|-----|------|-----|-----|------|------|-----|-----|------|-----|------|-----|-----|------|-----|-----|------|-----|-----|-----|------|
| <i>Entomoneis</i> sp.                                                      | 0.0 | 0.0  | 0.0 | 0.0 | 0.0 | 0.0 | 0.0 | 0.0 | 0.0 | 0.0 | 0.0  | 0.0 | 0.0 | 0.0  | 0.0  | 0.0 | 0.0 | 0.0  | 0.0 | 0.0  | 0.1 | 0.0 | 0.0  | 0.0 | 0.0 | 0.0  | 0.0 | 0.0 | 0.0 | 0.2  |
| <i>Entomoneis ornata</i> (Bailey) Reimer                                   | 0.8 | 0.0  | 0.0 | 0.0 | 0.0 | 0.0 | 0.0 | 0.0 | 0.0 | 0.0 | 0.0  | 0.0 | 0.0 | 0.0  | 0.0  | 0.2 | 0.0 | 0.0  | 0.0 | 0.0  | 0.0 | 0.0 | 0.0  | 0.0 | 0.0 | 0.0  | 0.0 | 0.0 | 0.0 | 0.0  |
| <i>Epithemia adnata</i> (Kützing) Brébisson                                | 0.0 | 0.0  | 0.0 | 0.0 | 0.0 | 0.0 | 0.0 | 0.0 | 0.0 | 0.2 | 0.0  | 0.0 | 0.0 | 0.0  | 0.0  | 0.0 | 0.0 | 0.0  | 0.0 | 0.0  | 0.0 | 0.0 | 0.0  | 0.0 | 0.0 | 0.0  | 0.0 | 0.0 | 0.0 | 0.0  |
| <i>Eunotia major</i> (W.Smith) Rabenhorst                                  | 0.0 | 0.0  | 0.0 | 0.0 | 0.0 | 0.0 | 0.0 | 0.0 | 0.0 | 0.0 | 0.0  | 0.0 | 0.0 | 0.0  | 0.0  | 0.0 | 0.0 | 0.0  | 0.0 | 0.0  | 0.0 | 0.0 | 0.0  | 0.0 | 0.0 | 0.0  | 0.0 | 0.1 | 0.0 | 0.0  |
| <i>Eunotia pseudosudetica</i> Metzeltin, Lange-Bertalot & García-Rodríguez | 0.0 | 0.0  | 0.0 | 0.0 | 0.0 | 0.0 | 0.0 | 0.0 | 0.0 | 0.0 | 0.1  | 0.0 | 0.0 | 0.0  | 0.0  | 0.0 | 0.0 | 0.0  | 0.0 | 0.0  | 0.0 | 0.0 | 0.0  | 0.0 | 0.0 | 0.0  | 0.0 | 0.1 | 0.0 | 0.0  |
| <i>Fallacia</i> sp.1                                                       | 0.1 | 0.2  | 0.1 | 0.0 | 0.2 | 0.1 | 0.1 | 0.0 | 0.1 | 0.0 | 0.2  | 0.0 | 0.0 | 0.0  | 0.3  | 0.0 | 0.3 | 0.0  | 0.4 | 0.0  | 0.7 | 0.0 | 0.0  | 0.0 | 0.0 | 0.0  | 0.0 | 0.2 | 0.1 | 0.0  |
| <i>Fallacia floriniae</i> (M.Møller) Witkowski                             | 0.0 | 0.0  | 0.0 | 0.0 | 0.0 | 0.0 | 0.0 | 0.0 | 0.0 | 0.0 | 0.0  | 0.0 | 0.0 | 0.1  | 0.0  | 0.0 | 0.0 | 0.0  | 0.0 | 0.0  | 0.0 | 0.0 | 0.0  | 0.0 | 0.0 | 0.0  | 0.0 | 0.0 | 0.0 | 0.0  |
| <i>Fallacia pygmaea</i> (Kützing) Stickle & D.G.Mann                       | 0.0 | 0.0  | 0.0 | 0.0 | 0.0 | 0.0 | 0.0 | 0.0 | 0.0 | 0.0 | 0.0  | 0.0 | 0.1 | 0.0  | 0.0  | 0.0 | 0.0 | 0.0  | 0.0 | 0.0  | 0.0 | 0.0 | 0.0  | 0.0 | 0.0 | 0.0  | 0.0 | 0.0 | 0.0 | 0.0  |
| • <i>Fistulifera saprophila</i> (Lange-Bertalot & Bonik) Lange-Bertalot    | 0.4 | 0.3  | 0.1 | 0.2 | 0.4 | 0.1 | 0.4 | 0.0 | 0.3 | 0.1 | 1.4  | 4.1 | 0.1 | 0.2  | 0.1  | 0.7 | 2.5 | 2.5  | 0.1 | 7.8  | 1.4 | 1.6 | 1.4  | 2.6 | 0.0 | 0.2  | 0.1 | 0.8 | 0.6 | 0.6  |
| • <i>Fragilaria</i> sp.1                                                   | 0.0 | 0.0  | 0.0 | 0.0 | 0.0 | 0.0 | 0.0 | 0.0 | 0.2 | 0.0 | 0.0  | 1.6 | 0.8 | 0.4  | 0.0  | 0.0 | 0.0 | 0.0  | 0.0 | 0.0  | 0.0 | 0.3 | 0.0  | 0.0 | 0.0 | 0.0  | 0.0 | 0.0 | 0.0 | 0.0  |
| <i>Fragilaria capucina</i> Desmazières                                     | 0.1 | 0.0  | 0.0 | 0.0 | 0.0 | 0.0 | 0.0 | 0.0 | 0.0 | 0.0 | 0.0  | 0.0 | 0.0 | 0.0  | 0.0  | 0.0 | 0.0 | 0.0  | 0.0 | 0.0  | 0.0 | 0.0 | 0.0  | 0.0 | 0.0 | 0.0  | 0.0 | 0.0 | 0.0 | 0.0  |
| <i>Fragilaria cassubica</i> Witkowski & Lange-Bertalot                     | 0.1 | 0.0  | 0.0 | 0.0 | 0.0 | 0.0 | 0.0 | 0.0 | 0.0 | 0.0 | 0.0  | 0.0 | 0.0 | 0.0  | 0.0  | 0.0 | 0.0 | 0.0  | 0.0 | 0.0  | 0.0 | 0.0 | 0.0  | 0.0 | 0.0 | 0.0  | 0.0 | 0.0 | 0.0 | 0.0  |
| <i>Gomphonema gracile</i> Ehrenberg                                        | 0.3 | 0.0  | 0.0 | 0.0 | 0.0 | 0.0 | 0.0 | 0.0 | 0.0 | 0.0 | 0.0  | 0.0 | 0.0 | 0.0  | 0.0  | 0.0 | 0.0 | 0.0  | 0.0 | 0.0  | 0.0 | 0.0 | 0.0  | 0.0 | 0.0 | 0.0  | 0.0 | 0.0 | 0.0 | 0.0  |
| <i>Gomphonema parvulum</i> (Kützing) Kützing                               | 0.1 | 0.0  | 0.0 | 0.0 | 0.0 | 0.0 | 0.0 | 0.0 | 0.0 | 0.0 | 0.0  | 0.0 | 0.0 | 0.0  | 0.0  | 0.0 | 0.0 | 0.0  | 0.0 | 0.0  | 0.0 | 0.0 | 0.0  | 0.0 | 0.0 | 0.0  | 0.0 | 0.0 | 0.0 | 0.0  |
| <i>Gyrosigma pensacolatae</i> F.A.S.Sterrenburg                            | 0.0 | 0.1  | 0.0 | 0.0 | 0.0 | 0.0 | 0.0 | 0.0 | 0.0 | 0.1 | 0.0  | 0.0 | 0.1 | 0.0  | 0.0  | 0.0 | 0.0 | 0.0  | 0.0 | 0.0  | 0.0 | 0.0 | 0.0  | 0.0 | 0.0 | 0.0  | 0.1 | 0.0 | 0.0 | 0.0  |
| <i>Halamphora sabiniana</i> (Reimer) Levkov                                | 0.4 | 0.2  | 0.2 | 0.0 | 0.0 | 0.0 | 0.0 | 0.0 | 0.0 | 0.0 | 0.2  | 0.0 | 0.0 | 0.0  | 0.1  | 0.0 | 0.0 | 0.0  | 0.1 | 0.0  | 0.0 | 0.0 | 0.0  | 0.0 | 0.0 | 0.0  | 0.0 | 0.0 | 0.0 | 0.0  |
| <i>Halamphora tumida</i> (Hustedt) Levkov                                  | 0.0 | 0.0  | 0.0 | 0.0 | 0.0 | 0.0 | 0.0 | 0.0 | 0.0 | 0.0 | 0.0  | 1.1 | 0.1 | 0.1  | 0.4  | 0.2 | 0.4 | 0.0  | 0.2 | 0.2  | 0.2 | 0.0 | 0.0  | 0.0 | 0.5 | 0.2  | 0.0 | 0.6 | 0.0 | 0.2  |
| <i>Hippodonta hungarica</i> (Grunow) Lange-Bertalot, Metzeltin & Witkowski | 0.7 | 0.0  | 0.0 | 0.0 | 0.0 | 0.0 | 0.0 | 0.0 | 0.0 | 0.0 | 0.2  | 0.0 | 0.0 | 0.1  | 0.0  | 0.2 | 0.2 | 0.0  | 0.0 | 0.1  | 0.0 | 0.0 | 0.0  | 0.0 | 0.0 | 0.0  | 0.1 | 0.0 | 0.1 | 0.0  |
| <i>Hyalodiscus</i> cf. <i>sphaerophorus</i> Makarova                       | 0.0 | 0.1  | 0.1 | 0.0 | 0.0 | 0.1 | 0.0 | 0.0 | 0.0 | 0.0 | 0.0  | 0.0 | 0.1 | 0.0  | 0.0  | 0.1 | 0.1 | 0.1  | 0.2 | 0.0  | 0.2 | 0.2 | 0.0  | 0.1 | 0.0 | 0.0  | 0.0 | 0.0 | 0.0 | 0.0  |
| <i>Hyalodiscus scoticus</i> (Kützing) Grunow                               | 0.0 | 0.0  | 0.0 | 0.0 | 0.0 | 0.0 | 0.0 | 0.0 | 0.0 | 0.0 | 0.0  | 0.0 | 0.0 | 0.0  | 0.0  | 0.0 | 0.1 | 0.0  | 0.0 | 0.0  | 0.0 | 0.0 | 0.0  | 0.0 | 0.2 | 0.0  | 0.0 | 0.0 | 0.0 | 0.1  |
| <i>Licmophora abbreviata</i> C.Agardh                                      | 0.0 | 0.0  | 0.0 | 0.0 | 0.0 | 0.0 | 0.0 | 0.0 | 0.0 | 0.0 | 0.0  | 0.0 | 0.0 | 0.0  | 0.0  | 0.0 | 0.0 | 0.0  | 0.0 | 0.0  | 0.0 | 0.0 | 0.0  | 0.0 | 0.0 | 0.0  | 0.0 | 0.0 | 0.0 | 0.1  |
| <i>Mastogloia</i> sp.1                                                     | 0.0 | 0.0  | 0.0 | 0.0 | 0.0 | 0.0 | 0.0 | 0.0 | 0.0 | 0.0 | 0.0  | 0.0 | 0.1 | 0.0  | 0.0  | 0.0 | 0.0 | 0.0  | 0.0 | 0.0  | 0.0 | 0.0 | 0.0  | 0.1 | 0.0 | 0.0  | 0.0 | 0.0 | 0.0 | 0.0  |
| <i>Mastogloia</i> sp.2                                                     | 0.0 | 0.0  | 0.0 | 0.0 | 0.0 | 0.0 | 0.0 | 0.0 | 0.0 | 0.0 | 0.0  | 0.0 | 0.0 | 0.0  | 0.0  | 0.0 | 0.0 | 0.0  | 0.2 | 0.0  | 0.0 | 0.0 | 0.0  | 0.0 | 0.0 | 0.0  | 0.0 | 0.0 | 0.0 | 0.0  |
| • <i>Mastogloia pumila</i> (Grunow) Cleve                                  | 0.1 | 11.2 | 7.4 | 0.0 | 4.7 | 0.4 | 9.4 | 0.0 | ##  | 0.1 | 11.1 | 0.9 | 0.9 | 0.0  | 0.2  | 0.0 | 0.1 | 0.0  | 0.9 | 0.1  | 0.1 | 0.0 | 0.0  | 0.0 | 0.0 | 57.9 | 0.0 | 2.0 | 3.7 | 0.2  |
| • <i>Melosira moniliformis</i> var. <i>octogona</i> (Grunow) Hustedt       | 0.6 | 2.0  | 7.8 | 0.7 | ##  | 2.4 | 3.9 | 1.5 | 4.8 | 0.9 | 5.0  | 8.8 | 2.8 | 10.5 | 22.8 | 8   | 0.5 | 6.8  | 0.6 | 11.4 | 2.4 | 2.5 | 14.7 | 6.6 | 9.7 | 1.8  | 9.7 | 4.3 | ##  | 26.6 |
| <i>Melosira varians</i> C.Agardh                                           | 0.0 | 0.2  | 0.0 | 0.0 | 0.0 | 0.0 | 0.0 | 0.0 | 0.0 | 0.0 | 0.0  | 0.0 | 0.0 | 0.0  | 0.0  | 0.0 | 0.0 | 0.0  | 0.0 | 0.0  | 0.0 | 0.0 | 0.0  | 0.0 | 0.0 | 0.0  | 0.0 | 0.0 | 0.0 | 0.2  |
| <i>Navicula</i> sp.1                                                       | 0.0 | 0.0  | 0.0 | 0.0 | 0.0 | 0.0 | 0.0 | 0.0 | 0.0 | 0.0 | 0.0  | 0.0 | 0.0 | 0.0  | 0.0  | 0.0 | 0.0 | 0.0  | 0.0 | 0.0  | 0.0 | 0.0 | 0.0  | 0.0 | 0.0 | 0.0  | 0.0 | 0.0 | 0.0 | 0.1  |
| <i>Navicula</i> sp.2                                                       | 0.0 | 0.0  | 0.0 | 0.0 | 0.0 | 0.0 | 0.0 | 0.0 | 0.2 | 0.0 | 0.0  | 0.0 | 0.5 | 0.0  | 0.0  | 0.0 | 0.0 | 0.0  | 0.0 | 0.0  | 0.0 | 0.0 | 0.0  | 0.0 | 0.0 | 0.0  | 0.0 | 0.0 | 0.0 | 0.0  |
| • <i>Navicula</i> sp.3                                                     | 0.0 | 0.0  | 0.0 | 0.0 | 0.0 | 0.0 | 0.0 | 0.0 | 0.8 | 0.0 | 0.0  | 0.0 | 0.0 | 0.0  | 0.0  | 0.0 | 0.3 | 17.5 | 0.0 | 0.0  | 0.0 | 0.6 | 0.6  | 0.2 | 0.0 | 0.0  | 0.0 | 0.0 | 0.0 | 0.0  |

|                                                                          |      |     |     |     |     |     |         |     |     |     |     |     |     |     |     |     |     |     |     |     |     |     |     |     |      |     |     |      |     |     |      |     |     |
|--------------------------------------------------------------------------|------|-----|-----|-----|-----|-----|---------|-----|-----|-----|-----|-----|-----|-----|-----|-----|-----|-----|-----|-----|-----|-----|-----|-----|------|-----|-----|------|-----|-----|------|-----|-----|
| Navicula sp.4                                                            | 0.0  | 0.1 | 0.0 | 0.0 | 0.0 | 0.0 | 0.0     | 0.0 | 0.0 | 0.0 | 0.1 | 0.0 | 0.3 | 0.0 | 0.0 | 0.0 | 0.0 | 0.0 | 0.0 | 0.0 | 0.0 | 0.0 | 0.0 | 0.0 | 0.0  | 0.0 | 0.0 | 0.0  | 0.0 | 0.0 | 0.0  |     |     |
| •Navicula sp.5                                                           | 0.0  | 0.0 | 0.0 | 0.0 | 0.0 | 0.0 | 0.0     | 0.0 | 0.0 | 1.6 | 0.0 | 0.2 | 0.0 | 0.0 | 0.0 | 0.1 | 1.9 | 0.3 | 0.0 | 0.0 | 0.0 | 0.0 | 0.0 | 0.0 | 0.0  | 0.0 | 0.0 | 0.0  | 0.0 | 0.0 | 0.0  | 0.0 |     |
| Navicula aff. valeriana Metzeltin, Lange-Bertalot & García-Rodríguez     | 0.0  | 0.0 | 0.0 | 0.0 | 0.0 | 0.0 | 0.0     | 0.0 | 0.0 | 0.0 | 0.1 | 0.0 | 0.1 | 0.0 | 0.0 | 0.0 | 0.2 | 0.0 | 0.0 | 0.0 | 0.0 | 0.0 | 0.1 | 0.0 | 0.0  | 0.0 | 0.0 | 0.0  | 0.0 | 0.0 | 0.0  | 0.0 |     |
| •Navicula cruxmeridionalis Metzeltin, Lan ge-Bertalot & García-Rodríguez | 2.8  | 0.7 | 0.5 | 0.0 | 2.0 | 0.0 | 1.0     | 0.3 | 0.7 | 0.0 | 0.6 | 1.3 | 0.5 | 4.9 | 0.8 | 0.2 | 0.2 | 0.4 | 0.5 | 1.2 | 5.7 | 0.5 | 1.3 | 0.8 | 0.1  | 0.9 | 0.4 | 8.7  | 0.0 | 0.3 |      |     |     |
| •Navicula cryptotenella Lange-Bertalot                                   | 3.1  | 0.1 | 0.2 | 0.1 | 0.4 | 0.1 | 0.2     | 3.5 | 0.2 | 0.5 | 0.0 | 5.9 | 0.1 | 0.1 | 0.0 | 0.2 | 0.1 | 2.4 | 0.1 | 0.6 | 0.3 | 1.0 | 0.2 | 0.3 | 0.0  | 0.0 | 0.5 | 2.3  | 0.0 | 0.0 |      |     |     |
| Navicula germainii J.H.Wallace                                           | 1.1  | 0.0 | 0.7 | 0.0 | 0.1 | 0.0 | 0.0     | 0.0 | 0.0 | 0.0 | 0.0 | 0.0 | 0.0 | 0.0 | 0.0 | 0.0 | 0.0 | 0.0 | 0.0 | 0.0 | 0.0 | 0.0 | 0.0 | 0.0 | 0.0  | 0.0 | 0.0 | 0.0  | 0.0 | 0.0 | 0.0  | 0.0 |     |
| Navicula gregaria Donkin                                                 | 0.2  | 0.0 | 0.0 | 0.0 | 0.0 | 0.0 | 0.0     | 0.0 | 0.0 | 0.0 | 0.0 | 0.0 | 0.0 | 0.0 | 0.0 | 0.0 | 0.0 | 0.0 | 0.1 | 0.0 | 0.0 | 0.0 | 0.0 | 0.0 | 0.0  | 0.0 | 0.0 | 0.0  | 0.0 | 0.0 | 0.0  | 0.0 |     |
| Navicula meridiorecens Metzeltin, Lange-Bertalot & García-Rodríguez      | 0.0  | 0.0 | 0.0 | 0.0 | 0.0 | 0.0 | 0.0     | 0.0 | 0.0 | 0.0 | 0.0 | 0.3 | 0.0 | 0.1 | 0.0 | 0.1 | 0.0 | 0.0 | 0.0 | 0.0 | 0.0 | 0.0 | 0.0 | 0.0 | 0.0  | 0.0 | 0.0 | 0.0  | 0.0 | 0.0 | 0.0  | 0.0 |     |
| Navicula subrhynchocephala Hustedt                                       | 0.0  | 0.0 | 0.0 | 0.0 | 0.0 | 0.0 | 0.0     | 0.0 | 0.0 | 0.0 | 0.0 | 0.0 | 0.0 | 0.0 | 0.0 | 0.2 | 0.0 | 0.0 | 0.0 | 0.0 | 0.0 | 0.1 | 0.0 | 0.0 | 0.0  | 0.0 | 0.0 | 0.0  | 0.0 | 0.0 | 0.0  | 0.0 |     |
| Nitzschia sp.2                                                           | 0.0  | 0.0 | 0.0 | 0.1 | 0.0 | 0.0 | 0.0     | 0.0 | 0.0 | 0.0 | 0.0 | 0.0 | 0.0 | 0.0 | 0.0 | 0.0 | 0.0 | 0.0 | 0.0 | 0.0 | 0.0 | 0.1 | 0.0 | 0.0 | 0.0  | 0.0 | 0.0 | 0.0  | 0.0 | 0.0 | 0.0  | 0.0 |     |
| Nitzschia amplexens Hustedt                                              | 0.9  | 0.0 | 0.0 | 0.0 | 0.0 | 0.0 | 0.0     | 0.0 | 0.0 | 0.0 | 0.0 | 0.0 | 0.0 | 0.0 | 0.0 | 0.0 | 0.0 | 0.0 | 0.2 | 0.0 | 0.7 | 0.0 | 0.0 | 0.0 | 0.0  | 0.0 | 0.0 | 0.0  | 0.9 | 0.0 | 0.0  | 0.0 |     |
| Nitzschia brevissima Grunow                                              | 0.0  | 0.0 | 0.0 | 0.0 | 0.0 | 0.0 | 0.0     | 0.0 | 0.0 | 0.0 | 0.0 | 0.0 | 0.0 | 0.0 | 0.0 | 0.0 | 0.0 | 0.0 | 0.0 | 0.0 | 0.0 | 0.0 | 0.0 | 0.0 | 0.0  | 0.0 | 0.0 | 0.0  | 0.3 | 0.0 | 0.0  | 0.0 |     |
| •Nitzschia eutinensis Lange-Bertalot & M.Werum                           | 0.3  | 0.2 | 0.0 | 0.0 | 0.6 | 0.0 | ##<br># | 0.0 | 3.1 | 0.0 | 1.1 | 0.2 | 0.6 | 0.0 | 0.8 | 0.0 | 0.0 | 0.0 | 0.5 | 0.0 | 0.5 | 0.0 | 1.0 | 0.2 | 0.0  | 0.0 | 0.0 | 0.1  | 0.0 | 0.0 | 0.0  | 0.0 | 0.0 |
| •Nitzschia filiformis (W.Smith) Van Heurck                               | 1.4  | 0.0 | 0.0 | 0.0 | 0.0 | 0.0 | 0.0     | 0.1 | 0.0 | 0.0 | 0.0 | 0.0 | 0.0 | 0.0 | 0.0 | 0.0 | 0.0 | 0.0 | 0.0 | 0.0 | 0.0 | 0.0 | 0.0 | 0.0 | 0.0  | 0.0 | 0.0 | 0.0  | 4.1 | 0.0 | 0.0  | 0.0 |     |
| Nitzschia filiformis var. conferta (P.G.Richter) Lange-Bertalot          | 0.3  | 0.0 | 0.0 | 0.0 | 0.0 | 0.0 | 0.0     | 0.0 | 0.0 | 0.0 | 0.0 | 0.0 | 0.0 | 0.0 | 0.0 | 0.0 | 0.0 | 0.0 | 0.0 | 0.0 | 0.0 | 0.0 | 0.0 | 0.0 | 0.0  | 0.0 | 0.0 | 0.0  | 0.0 | 0.0 | 0.0  | 0.0 |     |
| •Nitzschia frustulum (Kützing) Grunow                                    | 14.6 | 4.0 | 4.8 | 4.0 | 6.1 | 5.0 | 4.1     | 6.0 | 2.9 | 0.2 | 0.7 | 1.5 | 1.1 | 0.0 | 0.8 | 0.3 | 0.7 | 0.7 | 0.4 | 0.2 | 1.3 | 0.4 | 2.6 | 1.0 | 44.5 | 0.2 | 0.6 | 0.7  | 2.0 | 1.2 |      |     |     |
| Nitzschia inconspicua Grunow                                             | 0.0  | 0.0 | 0.0 | 0.0 | 0.0 | 0.0 | 0.0     | 0.0 | 0.0 | 0.0 | 0.5 | 0.0 | 0.0 | 0.0 | 0.0 | 0.0 | 0.0 | 0.4 | 0.0 | 0.5 | 0.0 | 0.4 | 0.0 | 0.0 | 0.0  | 0.0 | 0.0 | 0.0  | 0.0 | 0.0 | 0.0  | 0.0 |     |
| Nitzschia linearis W.Smith                                               | 0.0  | 0.0 | 0.0 | 0.0 | 0.0 | 0.0 | 0.0     | 0.5 | 0.0 | 0.0 | 0.0 | 0.0 | 0.0 | 0.0 | 0.0 | 0.0 | 0.0 | 0.0 | 0.0 | 0.0 | 0.0 | 0.0 | 0.0 | 0.0 | 0.0  | 0.0 | 0.0 | 0.0  | 0.0 | 0.0 | 0.0  | 0.0 |     |
| •Nitzschia microcephala Grunow                                           | 0.0  | 0.0 | 0.0 | 0.0 | 0.0 | 0.0 | 0.0     | 0.0 | 0.0 | 0.0 | 0.0 | 0.0 | 0.6 | 0.0 | 0.0 | 0.0 | 0.0 | 0.0 | 0.0 | 0.0 | 0.5 | 0.0 | 0.0 | 0.0 | 0.0  | 0.0 | 0.0 | 0.0  | 0.2 | 0.0 | 23.8 | 0.0 |     |
| Nitzschia obtusa W.Smith                                                 | 0.0  | 0.0 | 0.3 | 0.0 | 0.0 | 0.0 | 0.0     | 0.0 | 0.0 | 0.0 | 0.0 | 0.0 | 0.0 | 0.0 | 0.0 | 0.0 | 0.0 | 0.0 | 0.0 | 0.0 | 0.0 | 0.0 | 0.0 | 0.0 | 0.0  | 0.2 | 0.0 | 0.0  | 0.0 | 0.0 | 0.0  | 0.0 |     |
| Nitzschia palea var. debilis (Kützing) Grunow                            | 0.7  | 0.0 | 0.0 | 0.0 | 0.0 | 0.0 | 0.0     | 0.0 | 0.0 | 0.0 | 0.0 | 0.0 | 0.0 | 0.0 | 0.0 | 0.0 | 0.0 | 0.0 | 0.0 | 0.0 | 0.0 | 0.0 | 0.0 | 0.0 | 0.0  | 0.0 | 0.0 | 0.0  | 0.0 | 0.0 | 0.0  | 0.0 |     |
| Nitzschia pumila Hustedt                                                 | 0.0  | 0.0 | 0.0 | 0.0 | 0.0 | 0.0 | 0.0     | 0.0 | 0.0 | 0.0 | 0.0 | 0.4 | 0.0 | 0.0 | 0.0 | 0.0 | 0.0 | 0.0 | 0.0 | 0.0 | 0.0 | 0.0 | 0.0 | 0.0 | 0.0  | 0.0 | 0.0 | 0.0  | 0.0 | 0.0 | 0.0  | 0.0 |     |
| Nitzschia reversa W.Smith                                                | 0.7  | 0.0 | 0.0 | 0.0 | 0.0 | 0.0 | 0.0     | 0.0 | 0.0 | 0.0 | 0.0 | 0.0 | 0.0 | 0.0 | 0.0 | 0.0 | 0.0 | 0.0 | 0.0 | 0.0 | 0.0 | 0.0 | 0.0 | 0.0 | 0.0  | 0.0 | 0.0 | 0.0  | 0.0 | 0.0 | 0.0  | 0.0 |     |
| Nitzschia rochensis Metzeltin, Lange-Bertalot & García-Rodríguez         | 0.1  | 0.0 | 0.0 | 0.0 | 0.0 | 0.0 | 0.0     | 0.0 | 0.0 | 0.0 | 0.0 | 0.0 | 0.0 | 0.0 | 0.0 | 0.0 | 0.0 | 0.1 | 0.0 | 0.8 | 0.7 | 0.0 | 0.0 | 0.0 | 0.0  | 0.0 | 0.0 | 0.0  | 0.0 | 0.0 | 0.0  | 0.0 |     |
| Nitzschia sigma (Kützing) W.Smith                                        | 0.1  | 0.0 | 0.0 | 0.0 | 0.0 | 0.0 | 0.0     | 0.0 | 0.0 | 0.0 | 0.0 | 0.0 | 0.0 | 0.0 | 0.0 | 0.0 | 0.0 | 0.0 | 0.0 | 0.0 | 0.0 | 0.0 | 0.0 | 0.0 | 0.0  | 0.0 | 0.0 | 0.0  | 0.0 | 0.0 | 0.0  | 0.0 |     |
| Nitzschia sigmoidea (Nitzsch) W.Smith                                    | 0.0  | 0.0 | 0.0 | 0.0 | 0.0 | 0.0 | 0.0     | 0.0 | 0.0 | 0.0 | 0.0 | 0.2 | 0.0 | 0.1 | 0.2 | 0.2 | 0.0 | 0.0 | 0.0 | 0.0 | 0.0 | 0.0 | 0.0 | 0.0 | 0.0  | 0.0 | 0.0 | 0.0  | 0.0 | 0.0 | 0.0  | 0.0 |     |
| Nitzschia sp.1                                                           | 0.0  | 0.0 | 0.0 | 0.0 | 0.3 | 0.0 | 0.0     | 0.0 | 0.8 | 0.0 | 2.2 | 0.0 | 1.3 | 0.0 | 0.0 | 0.0 | 1.2 | 0.0 | 0.2 | 0.0 | 0.0 | 0.0 | 0.3 | 0.0 | 0.0  | 0.0 | 0.0 | 0.0  | 0.0 | 0.0 | 0.0  | 0.0 |     |
| • Nitzschia subcohaerens var. scotica (Grunow) van Heurck                | 3.0  | 0.0 | 0.0 | 0.0 | 0.0 | 0.0 | 1.4     | 0.5 | 2.6 | 0.0 | 1.3 | 0.7 | 0.3 | 0.0 | 0.3 | 0.0 | 0.0 | 0.2 | 0.2 | 0.0 | 0.0 | 0.0 | 0.0 | 0.0 | 0.0  | 4.0 | 0.0 | 21.9 | 0.0 | 0.0 | 0.0  | 0.0 |     |

|                                                                                           |     |     |     |     |     |     |     |     |     |     |      |     |     |      |     |     |     |      |      |      |      |     |     |      |     |     |     |     |     |     |
|-------------------------------------------------------------------------------------------|-----|-----|-----|-----|-----|-----|-----|-----|-----|-----|------|-----|-----|------|-----|-----|-----|------|------|------|------|-----|-----|------|-----|-----|-----|-----|-----|-----|
| • <i>Paralia sulcata</i> (Ehrenberg) Cleve                                                | 0.0 | 0.0 | 0.0 | 0.0 | 0.0 | 0.1 | 0.0 | 0.1 | 0.0 | 4.9 | 0.0  | 0.3 | 0.1 | 2.8  | 0.0 | 6.4 | 0.8 | 0.6  | 0.0  | 0.6  | 0.1  | 0.8 | 0.0 | 0.0  | 0.6 | 0.0 | 2.7 | 0.0 | 0.0 | 2.6 |
| <i>Petroneis marina</i> (Ralfs) D.G.Mann                                                  | 0.0 | 0.0 | 0.0 | 0.0 | 0.0 | 0.0 | 0.0 | 0.0 | 0.0 | 0.0 | 0.0  | 0.0 | 0.0 | 0.0  | 0.0 | 0.0 | 0.0 | 0.0  | 0.0  | 0.0  | 0.0  | 0.0 | 0.0 | 0.0  | 0.0 | 0.0 | 0.0 | 0.0 | 0.2 | 0.0 |
| <i>Placoneis sovereignae</i> (Hustedt) Torgan & Donadel                                   | 0.3 | 0.2 | 0.0 | 0.0 | 0.2 | 0.0 | 0.1 | 0.0 | 0.0 | 0.0 | 0.1  | 0.0 | 0.3 | 0.0  | 0.1 | 0.0 | 0.2 | 0.0  | 0.1  | 0.0  | 0.2  | 0.0 | 0.0 | 0.0  | 0.0 | 0.2 | 0.0 | 0.1 | 0.2 | 0.0 |
| <i>Plagiogramma staurophorum</i> (W.Gregory) Heiberg                                      | 0.0 | 0.0 | 0.0 | 0.0 | 0.0 | 0.0 | 0.0 | 0.0 | 0.0 | 0.0 | 0.0  | 0.0 | 0.0 | 0.1  | 0.0 | 0.0 | 0.0 | 0.0  | 0.0  | 0.0  | 0.0  | 0.0 | 0.0 | 0.0  | 0.0 | 0.0 | 0.0 | 0.0 | 0.0 | 0.0 |
| <i>Plagiotropis lepidoptera</i> var. <i>proboscidea</i> (Cleve) Reimer                    | 0.0 | 0.2 | 0.0 | 0.0 | 0.2 | 0.0 | 0.0 | 0.0 | 0.0 | 0.0 | 0.0  | 0.0 | 0.0 | 0.0  | 0.0 | 0.0 | 0.0 | 0.0  | 0.0  | 0.0  | 0.0  | 0.0 | 0.0 | 0.0  | 0.0 | 0.0 | 0.0 | 0.0 | 0.0 | 0.0 |
| • <i>Planothidium</i> sp.                                                                 | 0.0 | 0.0 | 0.0 | 0.0 | 0.0 | 0.0 | 0.0 | 0.0 | 0.0 | 0.0 | 0.0  | 0.0 | 0.0 | 0.0  | 0.0 | 0.0 | 0.0 | 0.0  | 0.0  | 0.0  | 0.0  | 0.0 | 0.0 | 0.0  | 0.0 | 0.0 | 0.0 | 0.0 | 0.0 | 1.9 |
| <i>Planothidium delicatulum</i> (Kützing) Round & Bukhtiyarova                            | 1.0 | 1.0 | 0.4 | 0.1 | 0.5 | 0.1 | 0.2 | 0.0 | 0.2 | 0.0 | 0.6  | 0.3 | 0.3 | 0.2  | 0.0 | 0.7 | 0.3 | 0.0  | 1.2  | 0.9  | 1.1  | 0.0 | 0.1 | 0.1  | 0.1 | 0.2 | 0.2 | 0.6 | 0.6 | 0.2 |
| <i>Planothidium frequentissimum</i> (Lange-Bertalot) Lange-Bertalot                       | 0.0 | 0.0 | 0.0 | 0.0 | 0.0 | 0.0 | 0.0 | 0.0 | 0.0 | 0.0 | 0.1  | 0.0 | 0.0 | 0.0  | 0.0 | 0.0 | 0.0 | 0.0  | 0.0  | 0.0  | 0.0  | 0.0 | 0.0 | 0.0  | 0.0 | 0.0 | 0.0 | 0.0 | 0.0 | 0.0 |
| <i>Planothidium hauckianum</i> (Grunow) Bukhtiyarova                                      | 0.0 | 0.0 | 0.0 | 0.0 | 0.0 | 0.0 | 0.0 | 0.0 | 0.0 | 0.0 | 0.0  | 0.0 | 0.0 | 0.0  | 0.0 | 0.0 | 0.0 | 0.0  | 0.0  | 0.0  | 0.0  | 0.0 | 0.0 | 0.0  | 0.0 | 0.0 | 0.0 | 0.0 | 0.0 | 0.1 |
| <i>Planothidium lemmermannii</i> (Hustedt) E.A.Morales                                    | 0.1 | 0.1 | 0.1 | 0.0 | 0.1 | 0.0 | 0.0 | 0.0 | 0.0 | 0.2 | 0.0  | 0.0 | 0.0 | 0.0  | 0.0 | 0.0 | 0.0 | 0.0  | 0.0  | 0.0  | 0.0  | 0.0 | 0.0 | 0.0  | 0.0 | 0.0 | 0.0 | 0.0 | 0.0 | 0.0 |
| <i>Planothidium minutissimum</i> (Krasske) E.A.Morales                                    | 0.3 | 0.5 | 0.0 | 0.0 | 0.7 | 0.0 | 0.1 | 0.0 | 0.3 | 0.0 | 1.0  | 0.5 | 0.4 | 0.1  | 0.0 | 0.0 | 0.5 | 0.0  | 0.3  | 0.2  | 1.7  | 1.0 | 0.0 | 0.2  | 0.3 | 0.1 | 0.2 | 1.0 | 0.6 | 0.0 |
| <i>Pleurosigma</i> sp.                                                                    | 0.0 | 0.0 | 0.0 | 0.0 | 0.0 | 0.0 | 0.0 | 0.0 | 0.0 | 0.0 | 0.0  | 0.0 | 0.2 | 0.0  | 0.0 | 0.2 | 0.1 | 0.0  | 0.0  | 0.0  | 0.0  | 0.0 | 0.0 | 0.0  | 0.0 | 0.0 | 0.0 | 0.0 | 0.0 | 0.0 |
| <i>Pleurosigma salinarum</i> (Grunow) Grunow                                              | 0.1 | 0.0 | 0.0 | 0.0 | 0.0 | 0.0 | 0.0 | 0.0 | 0.0 | 0.0 | 0.0  | 0.0 | 0.0 | 0.0  | 0.1 | 0.0 | 0.0 | 0.0  | 0.0  | 0.0  | 0.0  | 0.0 | 0.0 | 0.0  | 0.0 | 0.0 | 0.0 | 0.0 | 0.0 | 0.0 |
| • <i>Pleurosira laevis</i> (Ehrenberg) Compère                                            | 0.1 | 0.0 | 0.2 | 0.7 | 0.3 | 0.2 | 0.0 | 0.1 | 0.2 | 3.9 | 0.0  | 0.2 | 0.2 | 53.7 | 1.1 | 3.9 | 0.8 | 22.4 | 0.1  | 33.5 | 3.8  | 2.8 | 4.5 | 13.7 | 0.1 | 0.0 | 0.1 | 0.5 | 0.0 | 2.7 |
| <i>Prestauroneis crucicula</i> (W.Smith) Genkal & Yarushina                               | 0.0 | 0.0 | 0.0 | 0.0 | 0.0 | 0.0 | 0.0 | 0.0 | 0.0 | 0.0 | 0.0  | 0.0 | 0.0 | 0.2  | 0.0 | 1.1 | 0.0 | 0.0  | 0.0  | 0.0  | 0.0  | 0.4 | 0.0 | 0.0  | 0.0 | 0.0 | 0.0 | 0.0 | 0.2 | 0.9 |
| <i>Pseudofallacia tenera</i> (Hustedt) Y.Liu, Kociolek & Q.Wang                           | 0.1 | 0.0 | 0.0 | 0.0 | 0.0 | 0.0 | 0.0 | 0.0 | 0.0 | 0.0 | 0.1  | 0.0 | 0.0 | 0.0  | 0.0 | 0.0 | 0.0 | 0.0  | 0.0  | 0.0  | 0.0  | 0.0 | 0.0 | 0.0  | 0.0 | 0.0 | 0.0 | 0.0 | 0.0 | 0.0 |
| • <i>Pseudopodosira echinus</i> (Frenguelli) Metzeltin, Lange-Bertalot & García-Rodríguez | 0.0 | 0.1 | 0.0 | 0.0 | 0.0 | 0.0 | 0.0 | 0.5 | 0.1 | 0.1 | 0.0  | 0.2 | 0.1 | 0.0  | 0.0 | 1.9 | 0.0 | 0.6  | 0.2  | 0.0  | 0.4  | 1.1 | 0.2 | 1.3  | 0.2 | 0.1 | 1.2 | 0.0 | 0.3 | 0.0 |
| <i>Pseudostaurosira</i> sp.                                                               | 0.0 | 0.0 | 0.0 | 0.0 | 0.0 | 0.0 | 0.0 | 0.0 | 0.7 | 0.0 | 0.0  | 0.0 | 0.0 | 0.0  | 0.0 | 0.0 | 0.0 | 0.0  | 0.0  | 0.0  | 0.0  | 0.0 | 0.0 | 0.0  | 0.0 | 0.0 | 0.0 | 0.0 | 0.0 | 0.0 |
| • <i>Pseudostaurosira brevistriata</i> (Grunow) D.M.Williams & Round                      | 7.6 | 8.2 | 0.0 | 0.0 | 2.9 | 1.3 | 9.3 | 0.1 | 4.0 | 0.0 | 11.5 | 7.3 | 3.0 | 0.0  | 1.7 | 2.0 | 6.9 | 0.3  | 20.4 | 0.0  | 14.2 | 2.6 | 0.9 | 0.3  | 0.0 | 2.0 | 1.1 | 2.5 | 5.9 | 7.5 |
| • <i>Pseudostaurosira clavatum</i> E.A.Morales                                            | 1.6 | 0.9 | 0.0 | 0.0 | 0.0 | 0.0 | 0.0 | 0.0 | 1.2 | 0.0 | 3.5  | 0.5 | 0.4 | 0.0  | 0.0 | 0.0 | 0.5 | 0.0  | 1.1  | 0.0  | 0.6  | 0.1 | 0.1 | 0.0  | 0.0 | 0.0 | 0.0 | 1.1 | 1.5 |     |
| • <i>Pseudostaurosiropsis geocollegarum</i> (Witkowski) E.A.Morales                       | 0.8 | 0.5 | 0.0 | 0.0 | 0.8 | 0.1 | 0.2 | 0.0 | 2.8 | 0.5 | 3.7  | 1.9 | 0.6 | 0.1  | 0.1 | 0.2 | 2.3 | 0.1  | 0.0  | 0.3  | 0.2  | 0.2 | 0.4 | 0.2  | 0.0 | 0.0 | 0.1 | 0.0 | 0.1 | 0.0 |
| <i>Rhaphoneis castracanei</i> Grunow                                                      | 0.0 | 0.0 | 0.0 | 0.0 | 0.0 | 0.0 | 0.0 | 0.0 | 0.0 | 0.0 | 0.0  | 0.0 | 0.0 | 0.0  | 0.0 | 0.0 | 0.0 | 0.0  | 0.1  | 0.0  | 0.0  | 0.0 | 0.0 | 0.0  | 0.0 | 0.1 | 0.0 | 0.0 | 0.0 | 0.0 |
| <i>Rhopalodia</i> sp.1                                                                    | 0.1 | 0.0 | 0.0 | 0.0 | 0.0 | 0.0 | 0.0 | 0.0 | 0.0 | 0.0 | 0.4  | 0.1 | 0.0 | 0.0  | 0.0 | 0.0 | 0.0 | 0.0  | 0.0  | 0.0  | 0.0  | 0.0 | 0.0 | 0.0  | 0.0 | 0.0 | 0.0 | 0.0 | 0.0 | 0.0 |
| <i>Rhopalodia</i> sp.2                                                                    | 0.0 | 0.0 | 0.0 | 0.0 | 0.0 | 0.0 | 0.0 | 0.0 | 0.0 | 0.0 | 0.0  | 0.0 | 0.0 | 0.0  | 0.0 | 0.0 | 0.0 | 0.0  | 0.2  | 0.0  | 0.0  | 0.0 | 0.0 | 0.0  | 0.0 | 0.0 | 0.2 | 0.0 | 0.0 | 0.0 |
| <i>Rhopalodia gibba</i> var. <i>ventricosa</i> (Kützing) H.Peragallo & M.Peragallo        | 0.0 | 0.0 | 0.0 | 0.0 | 0.0 | 0.0 | 0.0 | 0.0 | 0.0 | 0.0 | 0.0  | 0.0 | 0.0 | 0.0  | 0.0 | 0.0 | 0.0 | 0.0  | 0.0  | 0.0  | 0.0  | 0.0 | 0.0 | 0.0  | 0.0 | 0.1 | 0.0 | 0.0 | 0.0 | 0.0 |

|                                                                                                     |      |      |     |         |         |     |         |      |         |     |      |     |         |      |     |     |      |      |      |      |      |      |         |     |     |     |     |     |     |     |
|-----------------------------------------------------------------------------------------------------|------|------|-----|---------|---------|-----|---------|------|---------|-----|------|-----|---------|------|-----|-----|------|------|------|------|------|------|---------|-----|-----|-----|-----|-----|-----|-----|
| • <i>Rhopalodia rumrichiae</i> Krammer                                                              | 10.4 | 11.8 | 6.8 | 0.0     | 1.8     | 0.0 | 1.2     | 0.0  | 7.0     | 0.2 | 15.1 | 0.5 | 1.4     | 0.0  | 0.6 | 0.0 | 0.2  | 0.0  | 0.6  | 0.0  | 2.5  | 0.0  | 0.9     | 0.0 | 0.0 | 0.5 | 0.0 | 1.6 | 0.0 | 0.3 |
| <i>Seminavis norae</i> (Metzeltin, Lange-Bertalot & García-Rodríguez) Talgatti & Torgan             | 0.1  | 0.2  | 0.0 | 0.0     | 0.0     | 0.0 | 0.0     | 0.0  | 0.0     | 0.0 | 0.1  | 0.0 | 0.0     | 0.1  | 0.0 | 0.3 | 0.0  | 0.0  | 0.0  | 0.1  | 0.0  | 0.0  | 0.0     | 0.0 | 0.0 | 0.1 | 0.0 | 0.2 | 0.0 | 0.0 |
| • <i>Seminavis strigosa</i> (Hustedt) Danieledis & Economou-Amilli                                  | 2.2  | 0.0  | 0.1 | 0.0     | 0.3     | 0.0 | 0.0     | 0.0  | 0.2     | 0.1 | 0.0  | 0.0 | 0.2     | 0.0  | 0.0 | 0.1 | 0.0  | 0.1  | 0.0  | 0.2  | 0.0  | 0.0  | 0.0     | 0.0 | 0.0 | 0.0 | 0.0 | 0.0 | 0.0 | 0.0 |
| • <i>Skeletonema</i> sp.3                                                                           | 0.6  | 0.5  | 0.0 | 0.0     | 4.6     | 0.6 | ##<br># | 12.8 | 2.6     | 0.0 | 0.0  | 1.2 | 5.5     | 0.5  | 0.0 | 0.0 | 0.0  | 1.1  | 0.0  | 0.0  | 0.2  | 0.6  | 1.7     | 0.0 | 0.0 | 0.0 | 0.5 | 0.0 | 0.2 | 3.7 |
| • <i>Skeletonema</i> sp.2                                                                           | 0.0  | 0.0  | 0.0 | 0.0     | 0.0     | 0.0 | 0.0     | 0.0  | 2.1     | 0.0 | 0.3  | 0.0 | 0.5     | 0.0  | 0.0 | 0.0 | 22.5 | 0.0  | 0.6  | 0.0  | 0.0  | 0.0  | 3.2     | 0.0 | 0.0 | 0.0 | 0.0 | 0.0 | 1.3 | 0.0 |
| • <i>Skeletonema potamos</i> (C.I.Weber) Hasle                                                      | 0.0  | 0.0  | 0.0 | 0.0     | 0.0     | 0.0 | 0.0     | 0.0  | 0.7     | 0.0 | 0.0  | 0.0 | 0.0     | 0.0  | 0.0 | 0.0 | 0.0  | 0.0  | 5.1  | 0.0  | 0.5  | 0.0  | 0.0     | 0.0 | 0.0 | 0.2 | 0.0 | 0.0 | 0.0 | 0.0 |
| <i>Staurophora salina</i> (W.Smith) Mereschkowsky                                                   | 0.0  | 0.0  | 0.0 | 0.0     | 0.0     | 0.0 | 0.0     | 0.0  | 0.0     | 0.0 | 0.2  | 0.0 | 0.1     | 0.0  | 0.0 | 0.0 | 0.2  | 0.0  | 0.0  | 0.0  | 0.0  | 0.1  | 0.0     | 0.0 | 0.0 | 0.0 | 0.0 | 0.0 | 0.0 | 0.0 |
| <i>Staurosira longirostris</i> (Frenguelli) Metzeltin, Lange-Bertalot & García-Rodríguez            | 0.0  | 0.0  | 0.1 | 0.0     | 0.1     | 0.0 | 0.0     | 0.0  | 0.0     | 0.0 | 0.0  | 0.0 | 0.0     | 0.0  | 0.0 | 0.0 | 0.0  | 0.0  | 0.0  | 0.0  | 0.1  | 0.0  | 0.0     | 0.0 | 0.0 | 0.0 | 0.0 | 0.0 | 0.0 | 0.1 |
| • <i>Staurosirella guenter-grassii</i> (Witkowski & Lange-Bertalot) E.A.Morales, C.E.Wetzel & Ector | 0.3  | 0.0  | 0.0 | 0.0     | 0.6     | 0.0 | 0.0     | 0.0  | 2.4     | 0.0 | 2.4  | 0.0 | 0.1     | 0.0  | 0.0 | 0.0 | 2.2  | 0.0  | 11.0 | 0.0  | 2.6  | 0.0  | 0.4     | 0.0 | 0.0 | 0.0 | 0.0 | 0.9 | 1.1 | 0.0 |
| • <i>Staurosirella</i> aff. <i>ovata</i> E.A.Morales                                                | 2.7  | 3.2  | 0.0 | 0.0     | 0.0     | 0.0 | 0.0     | 0.0  | 0.0     | 0.4 | 0.0  | 1.0 | 0.0     | 0.1  | 0.0 | 0.0 | 1.0  | 0.0  | 0.0  | 0.0  | 2.1  | 0.0  | 0.0     | 0.0 | 0.0 | 0.0 | 0.0 | 0.0 | 0.5 | 0.0 |
| <i>Staurosirella martyi</i> (Héribaud-Joseph) E.A.Morales & K.M.Manoylov                            | 0.0  | 0.1  | 0.0 | 0.0     | 0.0     | 0.0 | 0.2     | 0.0  | 0.0     | 0.0 | 0.0  | 0.2 | 0.6     | 0.0  | 0.0 | 0.8 | 0.0  | 0.0  | 1.4  | 0.1  | 0.0  | 0.0  | 0.0     | 0.0 | 0.0 | 0.0 | 0.0 | 0.2 | 0.0 |     |
| <i>Surirella</i> sp.1                                                                               | 0.3  | 0.0  | 0.0 | 0.0     | 0.1     | 0.0 | 0.2     | 0.0  | 0.2     | 0.1 | 0.2  | 0.0 | 0.9     | 0.0  | 0.1 | 0.0 | 0.1  | 0.0  | 0.1  | 0.0  | 0.0  | 0.0  | 0.0     | 0.0 | 0.0 | 0.0 | 0.0 | 0.0 | 0.0 | 0.0 |
| <i>Surirella</i> sp.2                                                                               | 0.0  | 0.0  | 0.0 | 0.0     | 0.0     | 0.0 | 0.0     | 0.0  | 0.0     | 0.0 | 0.1  | 0.0 | 0.0     | 0.0  | 0.0 | 0.0 | 0.0  | 0.0  | 0.0  | 0.0  | 0.0  | 0.0  | 0.0     | 0.0 | 0.0 | 0.0 | 0.0 | 0.0 | 0.0 | 0.0 |
| <i>Surirella</i> sp.3                                                                               | 0.0  | 0.0  | 0.0 | 0.0     | 0.0     | 0.0 | 0.0     | 0.0  | 0.0     | 0.0 | 0.0  | 0.0 | 0.0     | 0.0  | 0.0 | 0.0 | 0.0  | 0.0  | 0.0  | 0.0  | 0.0  | 0.0  | 0.0     | 0.0 | 0.2 | 0.0 | 0.0 | 0.0 | 0.0 | 0.0 |
| <i>Surirella littoralis</i> Hustedt                                                                 | 0.0  | 0.0  | 0.0 | 0.0     | 0.0     | 0.0 | 0.0     | 0.0  | 0.0     | 0.0 | 0.0  | 0.0 | 0.0     | 0.0  | 0.0 | 0.0 | 0.0  | 0.0  | 0.0  | 0.0  | 0.0  | 0.0  | 0.0     | 0.0 | 0.0 | 0.1 | 0.0 | 0.2 | 0.0 | 0.0 |
| <i>Surirella</i> <i>rorata</i> Frenguelli                                                           | 0.0  | 0.0  | 0.0 | 0.0     | 0.0     | 0.0 | 0.0     | 0.0  | 0.0     | 0.0 | 0.0  | 0.0 | 0.0     | 0.1  | 0.0 | 0.4 | 0.0  | 0.0  | 0.0  | 0.0  | 0.2  | 0.0  | 0.0     | 0.0 | 0.0 | 0.0 | 0.0 | 0.2 | 0.0 | 0.0 |
| • <i>Tabularia fasciculata</i> (C.Agardh) D.M.Williams & Round                                      | 7.9  | 26.4 | ##  | 0.2     | ##<br># | 1.3 | 6.2     | 1.3  | ##<br># | 0.1 | 3.2  | 0.4 | 2.1     | 0.0  | 0.4 | 0.0 | 0.0  | 0.0  | 0.0  | 0.0  | 3.0  | 0.0  | 40.8    | 0.5 | 1.6 | 1.8 | 0.2 | 5.0 | 0.0 | 0.0 |
| • <i>Tabularia tabulata</i> (C.Agardh) Snoeijs                                                      | 0.6  | 0.5  | ##  | ##<br># | 78.3    | 5.0 | 56.2    | 67.3 | 4.6     | 3.1 | 54.0 | 1.2 | ##<br># | 29.0 | 3.3 | 2.3 | 0.0  | 17.7 | 18.4 | 14.7 | 23.2 | 20.1 | ##<br># | 3.1 |     |     |     |     |     |     |
| <i>Terpsinoë americana</i> (Bailey) Ralfs                                                           | 0.0  | 0.0  | 0.0 | 0.0     | 0.0     | 0.0 | 0.0     | 0.0  | 0.0     | 0.0 | 0.0  | 0.0 | 0.0     | 0.0  | 0.1 | 0.0 | 0.0  | 0.0  | 0.0  | 0.0  | 0.3  | 0.0  | 0.0     | 0.0 | 0.0 | 0.0 | 0.1 | 0.2 | 0.1 | 0.6 |
| <i>Terpsinoë musica</i> Ehrenberg                                                                   | 0.0  | 0.0  | 0.0 | 0.0     | 0.0     | 0.0 | 0.0     | 0.0  | 0.0     | 0.0 | 0.0  | 0.0 | 0.0     | 0.0  | 0.0 | 0.0 | 0.0  | 0.0  | 0.0  | 0.0  | 0.0  | 0.0  | 0.0     | 0.0 | 0.0 | 0.0 | 0.0 | 0.0 | 0.0 | 0.2 |
| <i>Thalassionema</i> sp.                                                                            | 0.0  | 0.0  | 0.0 | 0.0     | 0.0     | 0.0 | 0.0     | 0.0  | 0.0     | 0.0 | 0.0  | 0.0 | 0.0     | 0.0  | 0.0 | 0.0 | 0.0  | 0.0  | 0.0  | 0.0  | 0.0  | 0.0  | 0.0     | 0.0 | 0.0 | 0.0 | 0.1 | 0.0 | 0.0 | 0.0 |
| <i>Thalassiosira ferelineata</i> Hasle & G.A.Fryxell                                                | 0.0  | 0.0  | 0.0 | 0.0     | 0.0     | 0.0 | 0.0     | 0.0  | 0.0     | 0.0 | 0.0  | 0.0 | 0.0     | 0.0  | 0.0 | 0.2 | 0.0  | 0.0  | 0.0  | 0.0  | 0.0  | 0.0  | 0.0     | 0.0 | 0.0 | 0.0 | 0.0 | 0.0 | 0.0 | 0.0 |
| <i>Tryblionella acuminata</i> W.Smith                                                               | 0.6  | 0.5  | 0.3 | 0.0     | 1.3     | 0.2 | 0.0     | 0.3  | 0.3     | 0.1 | 0.5  | 0.8 | 0.2     | 0.0  | 0.0 | 0.0 | 0.3  | 0.2  | 0.0  | 0.0  | 0.0  | 0.0  | 0.0     | 0.0 | 0.0 | 0.2 | 0.0 | 0.1 | 0.0 | 0.0 |
| <i>Tryblionella circumsuta</i> (Bailey) Ralfs                                                       | 0.0  | 0.0  | 0.0 | 0.0     | 0.0     | 0.0 | 0.0     | 0.0  | 0.0     | 0.0 | 0.0  | 0.0 | 0.0     | 0.3  | 0.0 | 0.0 | 0.0  | 0.0  | 0.1  | 0.0  | 0.1  | 0.0  | 0.0     | 0.0 | 0.1 | 0.0 | 0.0 | 0.0 | 0.0 | 0.2 |
| <i>Tryblionella compressa</i> (Bailey) Poulin                                                       | 0.0  | 0.0  | 0.0 | 0.0     | 0.0     | 0.0 | 0.0     | 0.0  | 0.0     | 0.0 | 0.0  | 0.0 | 0.0     | 0.0  | 0.0 | 0.2 | 0.0  | 0.0  | 0.0  | 0.0  | 0.0  | 0.2  | 0.0     | 0.1 | 0.1 | 0.0 | 0.0 | 0.0 | 0.0 | 0.3 |

|                                                                                               |     |     |     |     |     |     |     |     |     |     |     |     |     |     |     |     |     |     |     |     |     |     |     |     |     |     |     |     |     |     |     |     |
|-----------------------------------------------------------------------------------------------|-----|-----|-----|-----|-----|-----|-----|-----|-----|-----|-----|-----|-----|-----|-----|-----|-----|-----|-----|-----|-----|-----|-----|-----|-----|-----|-----|-----|-----|-----|-----|-----|
| <i>Tryblionella debilis</i> Arnott ex O'Meara                                                 | 0.0 | 0.0 | 0.0 | 0.0 | 0.0 | 0.0 | 0.0 | 0.0 | 0.0 | 0.0 | 0.0 | 0.0 | 0.0 | 0.2 | 0.0 | 0.0 | 0.0 | 0.0 | 0.0 | 0.0 | 0.0 | 0.0 | 0.0 | 0.0 | 0.0 | 0.0 | 0.0 | 0.0 | 0.0 | 0.0 | 0.0 | 0.0 |
| <i>Tryblionella hungarica</i> (Grunow) Fren-<br>guelli                                        | 0.0 | 0.0 | 0.0 | 0.0 | 0.0 | 0.0 | 0.0 | 0.0 | 0.0 | 0.0 | 0.0 | 0.0 | 0.0 | 0.4 | 0.1 | 0.0 | 0.0 | 0.0 | 0.0 | 0.0 | 0.0 | 1.0 | 0.0 | 0.0 | 0.0 | 0.5 | 0.0 | 0.0 | 0.0 | 0.0 | 0.0 | 0.0 |
| • <i>Tryblionella persuadens</i> (Cholnoki)<br>K.P.Cavalcante, P.I.Tremarin &<br>T.A.V.Ludwig | 0.1 | 0.1 | 0.3 | 0.0 | 0.2 | 0.0 | 0.2 | 0.0 | 0.2 | 0.0 | 0.0 | 0.0 | 0.0 | 0.5 | 0.0 | 0.0 | 0.0 | 0.2 | 0.0 | 5.1 | 0.0 | 0.3 | 0.2 | 0.1 | 0.2 | 0.0 | 0.0 | 0.0 | 0.2 | 0.0 | 0.3 |     |
| <i>Tryblionella victoriae</i> Grunow                                                          | 0.2 | 0.0 | 0.1 | 0.0 | 0.0 | 0.0 | 0.0 | 0.0 | 0.0 | 0.0 | 0.0 | 0.0 | 0.0 | 0.0 | 0.0 | 0.1 | 0.0 | 0.1 | 0.0 | 0.1 | 0.0 | 0.1 | 0.0 | 0.0 | 0.0 | 0.0 | 0.0 | 0.0 | 0.0 | 0.0 | 0.0 | 0.0 |
